# Supplementary material for: The fabrication of flexible wearable electrodes based on a carbon nanotubes/nickel/nickelous hydroxide ternary composite by facile single-side printing technology
Source: Royal Society of Chemistry journal article supplement (doi:10.1039/d1dt01679b), 2021-01-01
Supplement: d1dt01679b1.pdf [file d1dt01679b1.pdf]

1 *Electronic supporting information†*

2

3

4 **Fabrication of flexible wearable electrodes based on carbon**  
5 **nanotubes/nickel/nickelous hydroxide ternary composites by**  
6 **a facile single side printing technology†**

7

8 Shixiong Zhai <sup>a, b, c</sup>, Mingliu Li <sup>a, b</sup>, Zhendong Jin <sup>a, b</sup>, JiaFeng Sun <sup>a, b</sup>, Hong Zhao<sup>a, b</sup>,

9 Zaisheng Cai <sup>a, b</sup>, Yaping Zhao <sup>a, b, \*</sup>

10

11 <sup>a</sup> *Key Lab of Science & Technology of Eco-textile, Ministry of Education, College of Chemistry, Chemical*

12 *Engineering and Biotechnology, Donghua University, Shanghai 201620, PR China*

13 <sup>b</sup> *College of Chemistry, Chemical Engineering and Biotechnology, Donghua University, Shanghai*

14 *201620, PR China*

15 <sup>c</sup> *Department of Chemistry, University of Calgary, Calgary, Alberta, T2N 1N4, Canada*

16

17

18 **2. Experiments**

19 *2.1 Oxidation process of carbon nanotubes*

20 The acidic oxidation of CNTs is a quite complex sequential process in which CNTs are  
21 gradually oxidized into many oxygen-containing intermediates <sup>1</sup>. These oxygen-containing  
22 groups are usually represented by carboxyl groups, carbonyl, hydroxyl, and other oxygen-  
23 containing groups. Overoxidation might cause CNT collapse and produce carbon species in

24 the form of CFs <sup>2</sup>. The oxidation process could be expressed as followed reaction <sup>3</sup>.

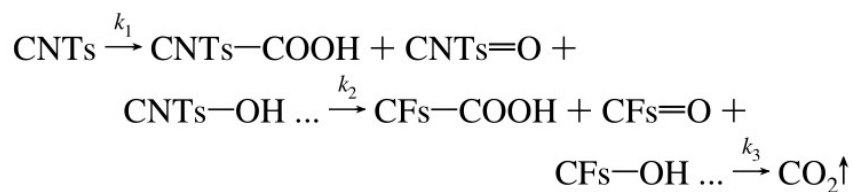

25

### 26 3. Results and discussions

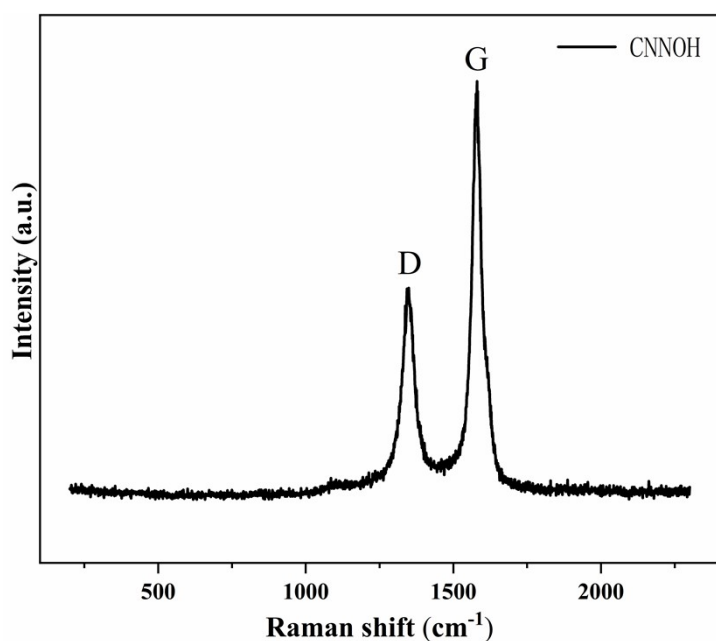

27

28 Fig. S1 Raman spectra of CNNOH

29

30 [1] Salzman, C. G.; Llewellyn, S. A.; Tobias, G.; Ward, M. A. H.; Huh, Y.; Green, M. L. H.

31 *Adv. Mater.* 2007, **19**, 883.

32 [2] Liu, J.; Rinzler, A. G.; Dai, H. J.; Hafner, J. H.; Bradley, R. K.; Boul, P. J.; Lu, A.; Iverson,

33 T.; Shlimov, K.; Huffman, C. B.; Rodriguez Macias, F.; Shon, Y. S.; Lee, T. R.; Colbert, D.

34 T.; Smalley, R. E. *Science* 1998, **280**, 1253

35 [3] Hao Yu, Yuguang Jin, Feng Peng, Hongjuan Wang, and Jian Yang. *J. Phys. Chem. C*

36 2008, **112**, 6758-6763.
